# Supplementary material for: Mild and efficient cyanuric chloride catalyzed Pictet–Spengler reaction
Source: PubMed Central journal article supplement (PMC3701375; doi:10.3762/bjoc.9.140), 2013-06-26
Supplement: Beilstein_J_Org_Chem-09-1235-s001.pdf [file Beilstein_J_Org_Chem-09-1235-s001.pdf]

## Supporting Information

for

### Mild and efficient cyanuric chloride catalyzed Pictet–Spengler reaction

Ashish Sharma, Mrityunjay Singh, Nitya Nand Rai and Devesh Sawant\*

Address: Department of Medicinal Chemistry, National Institute of Pharmaceutical Education and Research (NIPER)-Rae Bareli, ITI Compound, Rae Bareli-229010 (UP), India

Email: Devesh Sawant - [devesh.sawant@niperraebareli.edu.in](mailto:devesh.sawant@niperraebareli.edu.in)

\* Corresponding author

Analytical data and copies of  $^1\text{H}$  and  $^{13}\text{C}$  NMR of **3a**, **3c**, **3h** and **8d**

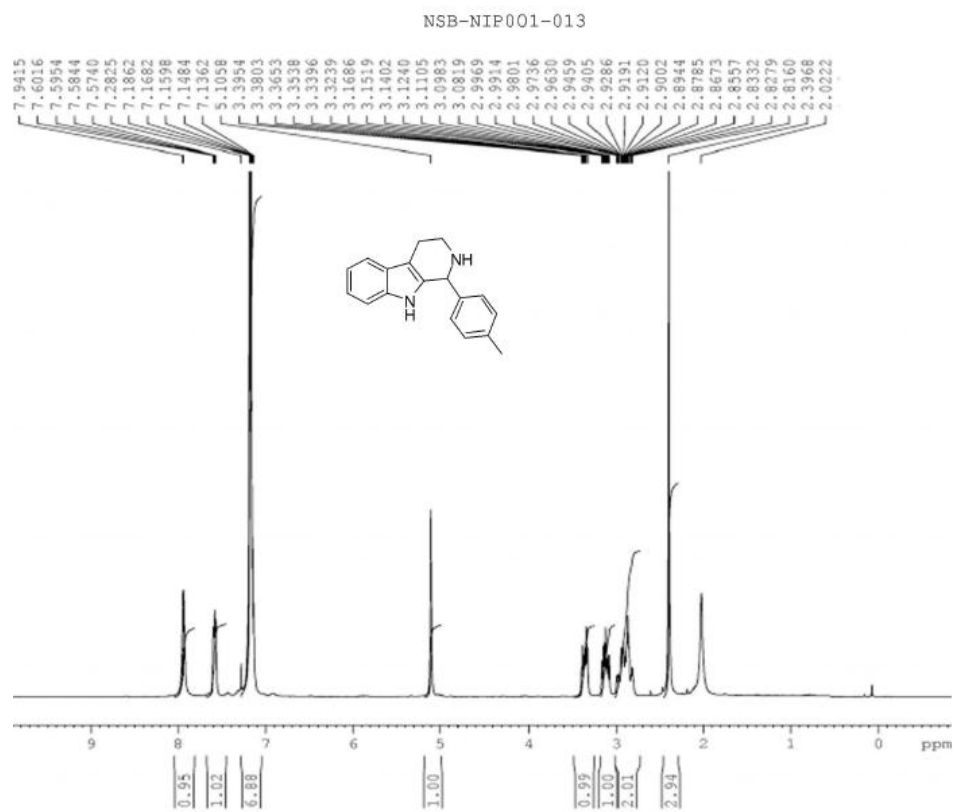

Figure S1:  $^1\text{H}$  NMR of 3a.

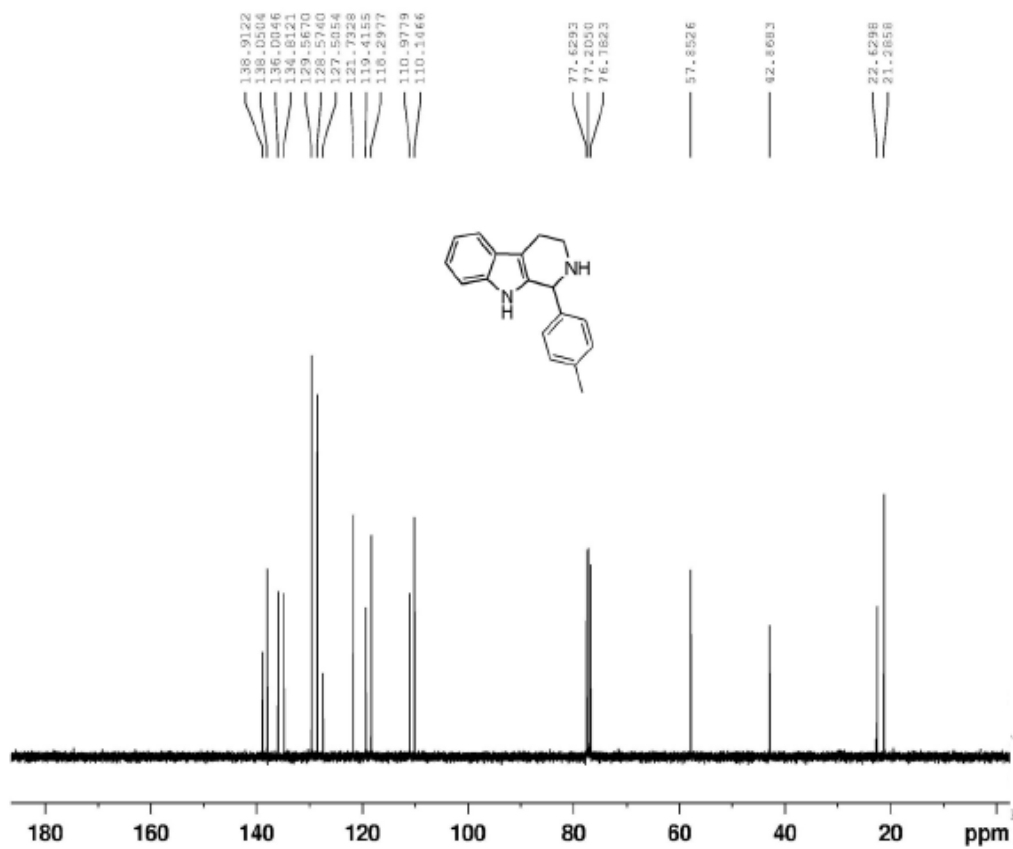

Figure S2:  $^{13}\text{C}$  NMR of 3a.

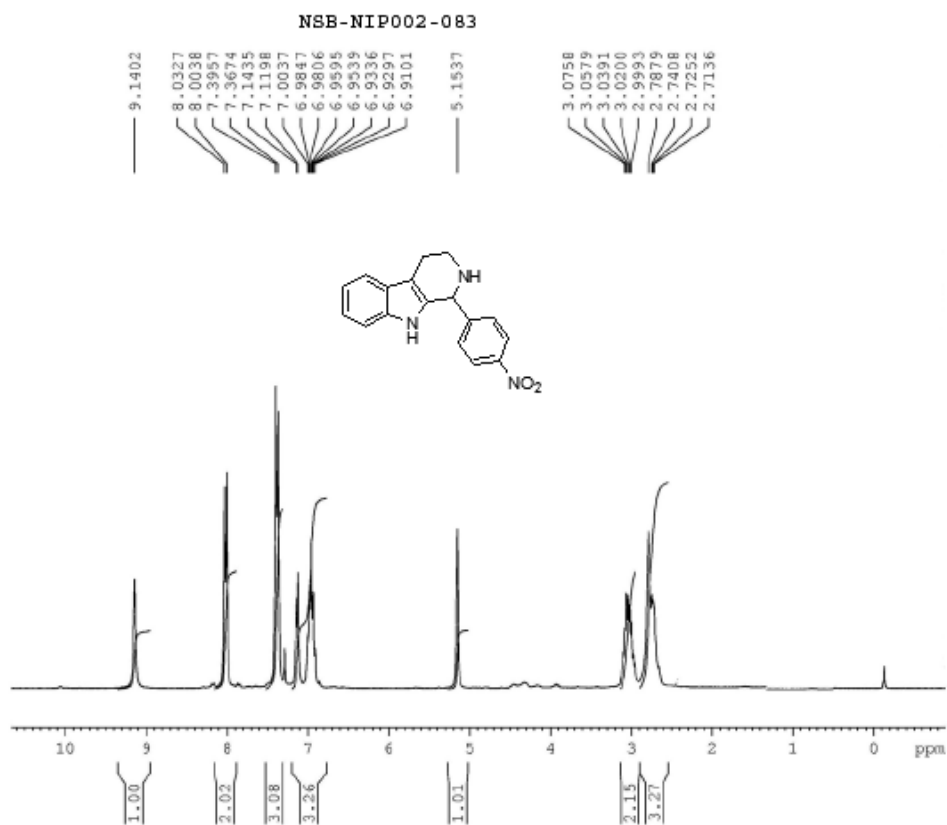

**Figure S3:**  $^1\text{H}$  NMR of **3c**.

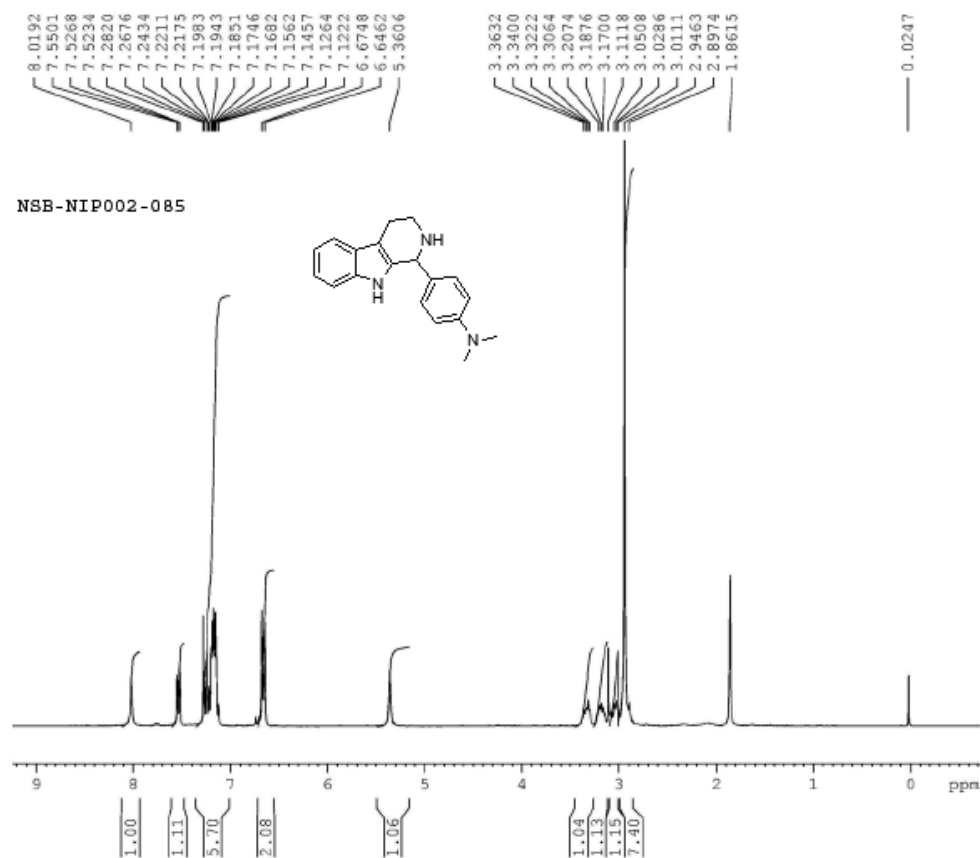

**Figure S4:**  $^1\text{H}$  NMR of **3h**.

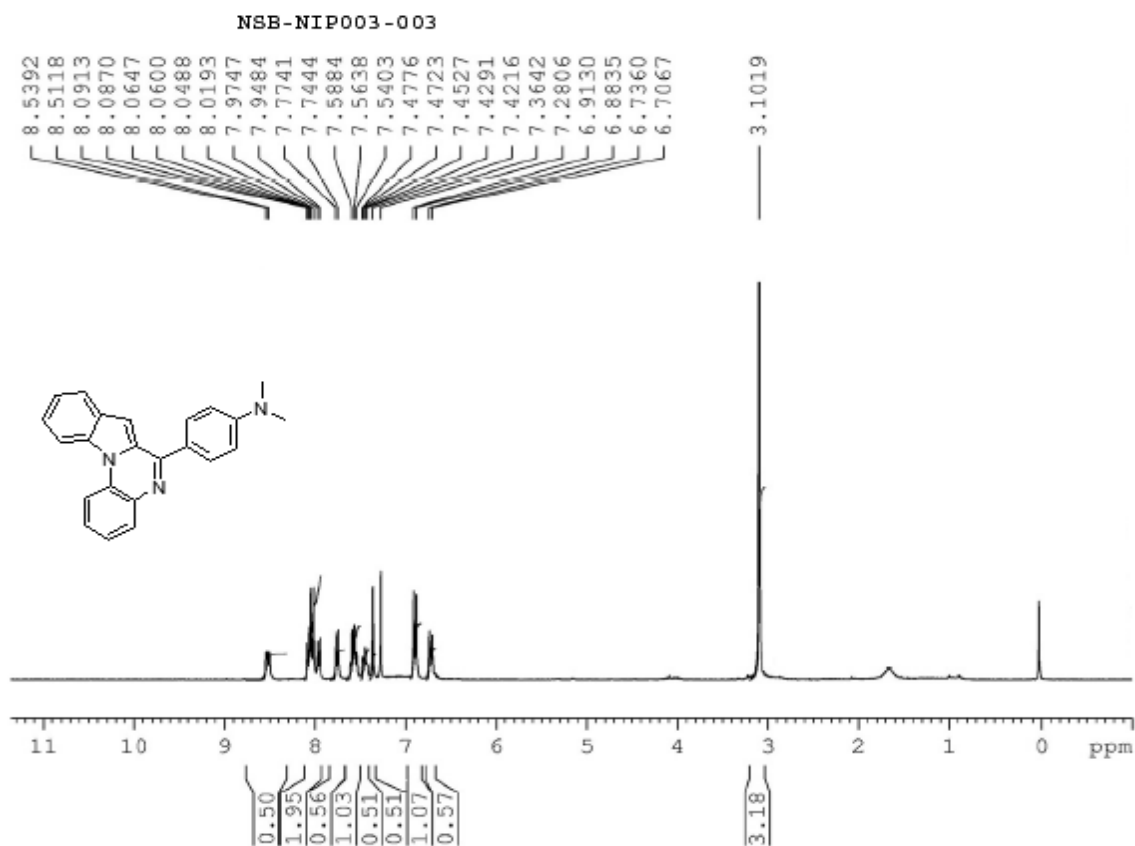

Figure S5:  $^1\text{H}$  NMR of 8d.

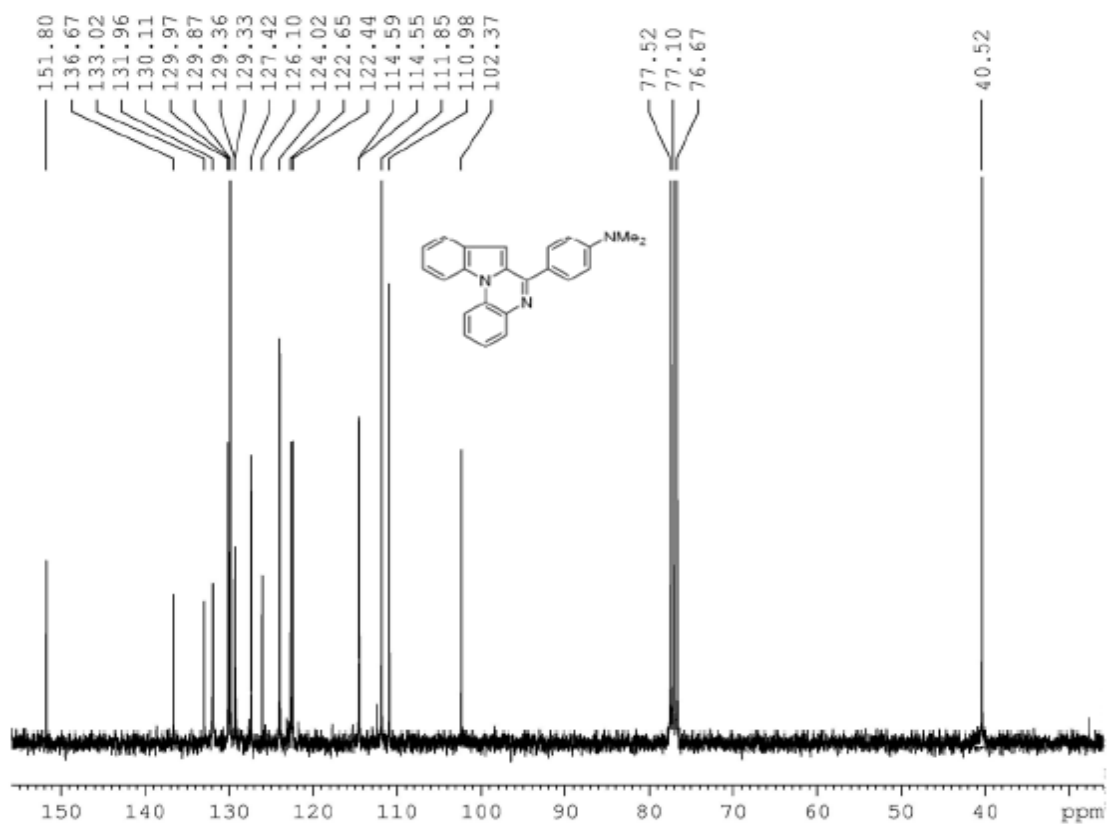

Figure S6:  $^{13}\text{C}$  NMR of 8d.
